# Supplementary material
Source: publisher figshare collection journal article supplement (https://gsapubs.figshare.com/ndownloader/files/22744448)
Supplement: Supplementary file 1 [file 22744448]

TABLE DR1. RADIOCARBON AGES USED TO CONSTRAIN TIMES OF DEFORMATION EVENTS IN TRENCHES

| Trenches and surface-deformation event(s)* | Age on Figs. 3-5 (x 1000 cal yr BP) <sup>†</sup> | Unit No. <sup>§</sup> | Calibrated age (cal yr BP at 2 ) <sup>#</sup> | Lab-reported age ( <sup>14</sup> C yr BP at 1 ) <sup>**</sup> | Radiocarbon Lab No. <sup>††</sup> |
|--------------------------------------------|--------------------------------------------------|-----------------------|-----------------------------------------------|---------------------------------------------------------------|-----------------------------------|
| <u>Blacktail trench</u>                    |                                                  |                       |                                               |                                                               |                                   |
| Post-unit-5 folding                        | -                                                | -                     | -                                             | -                                                             | -                                 |
| Deposition of unit 7                       | 11.4                                             | 7c                    | 11,550-11,200                                 | 9912±30 (2)                                                   | OS-25270                          |
|                                            | 11.2                                             | 7c                    | 11,600-10,750                                 | 9800±90                                                       | OS-25343                          |
|                                            | 7.8                                              | 7c                    | 7940-7670                                     | 6980±70s                                                      | OS-28471                          |
| Post-unit-8 folding                        | 1.2                                              | 9                     | 1300-1170                                     | 1320±40                                                       | GX-26089                          |
|                                            | 1.2                                              | 10a                   | 1330-1170                                     | 1340±45                                                       | OS-23308                          |
|                                            | 0.9                                              | 10b                   | 1060-720                                      | 980±80                                                        | Beta-137175                       |
| <u>Bear's Lair trench</u>                  |                                                  |                       |                                               |                                                               |                                   |
| Post-unit-3 folding                        | -                                                | -                     | -                                             | -                                                             | -                                 |
| Post-unit-5 folding                        | 11.5                                             | 5a                    | 12,000-11,500                                 | 9980±95s                                                      | OS-25440                          |
|                                            | 8.3                                              | 5c                    | 8410-8200                                     | 7530±40s                                                      | OS-25279                          |
|                                            | 8.0                                              | 5b                    | 8150-7870                                     | 7190±42s (2)                                                  | OS-24807                          |
|                                            | 7.8                                              | 5b                    | 7970-7690                                     | 7040±65s                                                      | OS-25342                          |
|                                            | 7.5                                              | 5b                    | 7660-7430                                     | 6680±50                                                       | Beta-125830                       |
|                                            | 6.5                                              | 5b                    | 3350-3070                                     | 3030±40s                                                      | CAMS-70167                        |
| Fissuring event D                          | 1.5                                              | 9c                    | 1570-1380                                     | 1590±40                                                       | GX-26075                          |
|                                            | 1.1                                              | 9c                    | 1230-960                                      | 1160±50                                                       | Beta-125831                       |
| <u>Saddle trench</u>                       |                                                  |                       |                                               |                                                               |                                   |
| Post-unit-4 faulting                       | -                                                | -                     | -                                             | -                                                             | -                                 |
| Post-unit-5 folding                        | -                                                | -                     | -                                             | -                                                             | -                                 |
| Post-unit-7 faulting                       | 3.5                                              | 7                     | 3700-3390                                     | 3320±65                                                       | OS-24906                          |
| event B? (and C? or D?)                    | 3.4                                              | 7                     | 3560-3350                                     | 3220±45s                                                      | OS-25278                          |
|                                            | 3.2                                              | 7                     | 3360-3060                                     | 3020±50                                                       | Beta-125683                       |
| <u>Mossy Lane trench</u>                   |                                                  |                       |                                               |                                                               |                                   |
| Pre-unit-3 folding                         | -                                                | -                     | -                                             | -                                                             | -                                 |
| Faulting event C                           | 1.5                                              | 2                     | 1730-1280                                     | 1590±110s                                                     | OS-25649                          |
|                                            | 1.3                                              | 2                     | 1350-1170                                     | 1360±40s                                                      | Beta-141781                       |
|                                            | 1.3                                              | 2                     | 1420-1060                                     | 1360±85                                                       | OS-25852                          |
|                                            | 1.3                                              | 2                     | 1530-1170                                     | 1440±90                                                       | OS-25648                          |
|                                            | 1.3                                              | 2                     | 1390-1260                                     | 1410±40                                                       | GX-26087                          |
|                                            | 1.2                                              | 2                     | 1270-1060                                     | 1240±35s                                                      | OS-25812                          |
| Faulting event D                           | 1.5                                              | 4                     | 1540-1350                                     | 1570±40                                                       | GX-26085                          |
|                                            | 1.4                                              | 4                     | 1520-1300                                     | 1500±40                                                       | Beta-141780                       |
|                                            | 1.3                                              | 4                     | 1370-1170                                     | 1370±50                                                       | GX-26086                          |
|                                            | 1.2                                              | 4                     | 1290-1170                                     | 1300±21 (4)                                                   | OS-25852                          |
|                                            | 1.2                                              | 4                     | 1270-1060                                     | 1230±30                                                       | OS-27359                          |
| <u>Crane Lake trench</u>                   |                                                  |                       |                                               |                                                               |                                   |
| Event A (?) <sup>§§</sup>                  | 2.5                                              | 6c                    | 2720-2330                                     | 2390±50s                                                      | OS-28473                          |
| Faulting event B                           | 2.6                                              | 7                     | 2760-2490                                     | 2550±30                                                       | OS-23302                          |
|                                            | 2.5                                              | 8a                    | 2720-2350                                     | 2440±30                                                       | GX-26072                          |
| Faulting event C                           | 1.9                                              | 9                     | 2050-1880                                     | 2010±30                                                       | OS-24762                          |
|                                            | 1.9                                              | 9                     | 2050-1820                                     | 1990±40                                                       | Beta-141777                       |
|                                            | 1.9                                              | 9                     | 2000-1810                                     | 1940±40                                                       | GX-26074                          |
|                                            | 1.8                                              | 10                    | 1900-1730                                     | 1896±19 (3)                                                   | OS-23306                          |
|                                            | 1.7                                              | 9                     | 1880-1560                                     | 1810±60                                                       | Beta-137174                       |
|                                            | 1.6                                              | 10                    | 1700-1520                                     | 1680±30s                                                      | OS-23303                          |
|                                            | 1.4                                              | 10                    | 1520-1310                                     | 1520±40s                                                      | Beta-141778                       |
| Faulting event D                           | 1.3                                              | 12                    | 1490-1290                                     | 1470±40                                                       | GX-26081                          |
|                                            | 1.3                                              | 13                    | 1360-1240                                     | 1390±35                                                       | OS-23312                          |
|                                            | 1.2                                              | 12                    | 1290-1170                                     | 1290±30                                                       | OS-23307                          |
|                                            | 1.2                                              | 14                    | 1290-1050                                     | 1240±50                                                       | GX-26082                          |
|                                            | 1.0                                              | 14                    | 1060-920                                      | 1060±30                                                       | OS-23309                          |

*Notes:* Ages used to estimate age of datums in Table 1. Only ages inferred, through comparison with other ages and stratigraphic relations within and among trenches (Fig. 6), to be within 500 years of time that unit was deposited are listed (solid triangles on Figs. 3-5). Ages are on unabraded fragments of wood charcoal, except for the following: Beta-125830, deciduous leaf base and wood fragments; GX-26075, wood fragment; Beta-125831, *Thuja plicata* leaf; OS-25812, 43 seeds or fecal pellets; and OS-25852, outer 7-10 rings of a charcoal log. In each sample, the largest, most angular, least decayed fragments of charcoal or plant material were selected to minimize the chance of analyzing carbon much older than the host sediment. In most samples, fragments with root-like morphology were avoided to minimize the chance of analyzing roots much younger than the host sediment. Except for a few of the most delicate fragments, sediment adhering to fragments was removed with brushes or dental tools in distilled water at 12-50X magnification. Complete <sup>14</sup>C data in Nelson et al. (2002). Dash indicates no ages available.

<sup>14</sup>C ages constrain at least maximum age of folding. Events listed from oldest to youngest. Most folding cannot be assigned to a single earthquake (Fig. 6), but stratigraphy and <sup>14</sup>C ages constrain at least maximum age of folding.

<sup>†</sup>Ages (x 1000 cal yr BP) are modes of calibrated-age distribution for each age rounded to nearest 100 years.

<sup>§</sup>Unit number as shown on Figs. 3-7 (only units mentioned in text are labeled on figures) and/or in detailed trench logs in Nelson et al. (2002).

<sup>#</sup>Ages in solar years (cal yr BP) calculated using OxCal (version 3.4; Bronk Ramsey, 1998; probability method) with the INTCAL98 dataset of Stuiver et al. (1998). Dating laboratories have stated that no additional interlaboratory variance (error multiplier, e.g., Taylor et al., 1996) is required for calibration. National Ocean Sciences AMS Facility (OS-) and Lawrence Livermore's (GX-, CAMS-) results from the Third International Radiocarbon Comparison show minimal offset from comparison means (e.g., Elder et al., 1998). Calibrated ages show time intervals of >95% probability distribution at 2σ.

<sup>\*\*</sup>AMS (accelerator mass spectrometer) <sup>14</sup>C ages reported by radiocarbon laboratory (<sup>14</sup>C yr BP; methods described in Gagnon et al., 2000), except for samples Beta-137174 and Beta-137175, which are conventional liquid-scintillation ages. Quoted error for each AMS analysis is the larger of counting error or target reproducibility error. An "s" following the reported age indicates samples that were picked from 1-mm and/or 0.5-mm sieves following wet sieving of bulk sediment samples (50-800 g sediment). Numbers in parentheses are number of ages on the same charcoal fragment averaged to obtain the mean age listed.

<sup>††</sup>C Laboratories are: OS, National Ocean Sciences AMS Facility, Woods Hole Oceanographic Institution, Woods Hole, Massachusetts; GX, Geochron Laboratories, Cambridge, Massachusetts (above group of GX samples analyzed on an accelerator at Lawrence Livermore National Laboratories); Beta, Beta Analytic, Inc., Miami, Florida; CAMS, Lawrence Livermore National Laboratories, Livermore, California.

<sup>§§</sup>As explained in text, event A may or may not record an earthquake.

#### References Cited in Table Notes:

Bronk Ramsey, C., 1998, Probability and dating: Radiocarbon, v. 40, p. 461-474.

Elder, K.L., McNichol, A.P., and Gagnon, A.R., 1998, Evaluating reproducibility of seawater, inorganic and organic carbon <sup>14</sup>C results at the National Ocean Sciences AMS Facility (NOSAMS): Radiocarbon, v. 40, p. 223-230.

Gagnon, A.R., McNichol, A.P., Donoghue, J.C., Stuart, D.R., and von Reden, K., 2000, The NOSAMS sample preparation laboratory in the next millennium: Progress after the WOCE program: Nuclear Instruments and Methods in Physical Research B, v. 172, p. 409-415.

Nelson, A.R., Johnson, S.Y., Wells, R.E., Pezzopane, S.K., Kelsey, H.M., Sherrod, B.L., Bradley, L.-A., Koehler, R.D., III, Bucknam, R.C., Haugerud, R.A., and LaPrade, W.T., 2002, Field and laboratory data from an earthquake history study of the Toe Jam Hill fault, Bainbridge Island, Washington: U.S. Geological Survey Open-File Report 02-60, 2 plates and 37 p. text (download at <http://pubs.usgs.gov/of/2002/ofr-02-0060/>).

Stuiver, M., Reimer, P.J., Bard, E., Beck, J.W., Burr, G.S., Hughen, K.A., Kromer, B., McCormac, G., Plicht, J.v.d., and Spurk, M., 1998, INTCAL98 radiocarbon age calibration, 24,000-0 cal BP: Radiocarbon, v. 40, p. 1041-1084.

Taylor, R.E., Stuiver, M., and Reimer, P.J., 1996, Development and extension of the calibration of the radiocarbon time scale: archaeological applications: Quaternary Science Reviews, v.15, p. 655-668.
